# Supplementary material for: The prognostic value of IPI in patients with primary breast lymphoma, a multicenter retrospective study
Source: Cancer Cell Int. 2022 Nov 15;22:357. doi: 10.1186/s12935-022-02772-y (PMC9664603; doi:10.1186/s12935-022-02772-y)
Supplement: Supplementary file 1 — Additional file 1: Table S1.Clinical data of each patients. [file 12935_2022_2772_MOESM1_ESM.xlsx]

## Sheet: Sheet1
Patient_ID	hospital	region	gender	age	ECOG	LDH	KI67(%)	WBC(10*9)	Neut(%)	Lmp(%)	β2-MG	c−Myc	BCL2	BCL6	Double -hit-lymphomas	Triple-hit- lymphomas	P53	CD5	CD3Neg	EBER	IPI	R-IPI	NCCN-IPI	ChT	RT	Surgery	Follow-up (years)	Survival
1	1	Beijing	f	66	0	213	60	NA	NA	NA	1	NA	NA	NA	NA	NA	Neg	NA	Pos	POS	IPI 2-5	R-IPI 1-2	NA	YES	NA	NO	0.969863	Yes
2	1	Jilin	f	59	0	167	70	9.35	57.1	NA	NA	POS	POS	Neg	YES	NO	Pos	Neg	Neg	Neg	IPI 0-1	R-IPI 0	NCCN-IPI 4-5	NA	NA	YES	1	Yes
3	1	Jilin	f	60	0	256	50	8.16	NA	21.3	2.3	NA	NA	NA	NA	NA	Pos	Pos	Neg	NA	IPI 2-5	R-IPI 3-5	NCCN-IPI 2-3	YES	NA	NO	1.0274	Yes
4	1	Jilin	f	60	0	NA	60	6.62	NA	22.5	2.4	NA	NA	NA	NA	NA	Pos	Neg	NA	NA	IPI 2-5	R-IPI 1-2	NA	YES	NA	YES	1.16164	Yes
5	1	Liaoning	f	30	0	189	50	5.32	NA	NA	2.7	NA	NA	NA	NA	NA	Pos	Pos	Pos	NA	IPI 0-1	R-IPI 1-2	NCCN-IPI 2-3	YES	NA	NO	1.17808	Yes
6	1	Beijing	f	69	0	270	40	4.46	79.5	22.6	NA	Neg	POS	Neg	NO	NO	Neg	Neg	NA	NA	IPI 2-5	R-IPI 3-5	NCCN-IPI 0-1	YES	NA	YES	1.23562	Yes
7	1	Sichuan	f	56	0	243	50	6.14	NA	25.6	NA	POS	POS	POS	YES	YES	Pos	Neg	Neg	Neg	IPI 0-1	R-IPI 1-2	NCCN-IPI 2-3	YES	NA	NO	1.92877	Yes
8	1	Liaoning	f	61	0	196	60	4.35	75.4	45.2	2.1	NA	Neg	NA	NA	NA	Pos	Neg	Pos	NA	IPI 2-5	R-IPI 1-2	NCCN-IPI 0-1	NO	NA	YES	2.04384	Yes
9	1	Beijing	f	40	0	330	70	7.02	61.2	NA	2.8	POS	POS	POS	YES	YES	Pos	Neg	Neg	Neg	IPI 0-1	R-IPI 0	NCCN-IPI 0-1	NA	NA	NO	2.10959	Yes
10	1	Neimenggu	f	59	0	385	60	2.37	81.3	51.6	1.7	POS	POS	Neg	YES	NO	Pos	Pos	Pos	Pos	IPI 0-1	R-IPI 0	NCCN-IPI 0-1	NA	NA	NO	2.31781	Yes
11	1	Beijing	f	57	0	189	70	4.64	NA	NA	NA	NA	NA	NA	NA	NA	Pos	Neg	Pos	NA	IPI 0-1	R-IPI 0	NCCN-IPI 2-3	NA	NA	NO	2.46849	Yes
12	1	Zhejiang	f	70	0	220	40	4.75	57.1	61.1	3.1	NA	Neg	Neg	NA	NA	NA	Neg	NA	Neg	IPI 0-1	R-IPI 1-2	NCCN-IPI 4-5	YES	NA	YES	2.51233	Yes
13	1	Neimenggu	f	56	0	197	80	6.04	58.1	46.7	1.8	POS	POS	POS	YES	YES	Pos	Pos	Pos	Neg	IPI 0-1	R-IPI 0	NCCN-IPI 2-3	YES	NA	NO	2.70411	Yes
14	1	Shandong	f	63	0	243	NA	6.35	82.5	NA	NA	NA	Neg	Neg	NA	NA	NA	NA	NA	Neg	IPI 0-1	R-IPI 1-2	NCCN-IPI 0-1	YES	NA	NO	2.75342	Yes
15	1	Beijing	f	32	0	226	30	6.12	67.2	47.8	3.5	POS	POS	POS	YES	YES	Neg	Pos	Neg	Neg	IPI 2-5	R-IPI 1-2	NCCN-IPI 2-3	YES	YES	NO	2.83288	Yes
16	1	Anhui	f	45	0	234	90	3.88	NA	28.4	3.6	Neg	POS	POS	NO	NO	Pos	Neg	Neg	Neg	IPI 0-1	R-IPI 1-2	NCCN-IPI 0-1	YES	NA	YES	2.98904	Yes
17	1	Henan	f	33	0	278.1	90	5.84	78.4	31.4	NA	POS	POS	POS	YES	YES	NA	Neg	Neg	Neg	IPI 2-5	R-IPI 1-2	NCCN-IPI 2-3	YES	NA	NO	3.00274	Yes
18	1	Beijing	f	58	0	292.3	80	4.51	67.5	33.5	2.1	NA	POS	POS	NA	NA	NA	Neg	Neg	Neg	IPI 0-1	R-IPI 0	NCCN-IPI 0-1	YES	NA	YES	3.06027	Yes
19	1	Beijing	f	70	0	190	80	5.6	56.7	35.5	2.3	POS	POS	Neg	YES	NO	NA	Neg	Neg	Neg	IPI 0-1	R-IPI 1-2	NCCN-IPI 2-3	NA	NA	YES	3.09589	Yes
20	1	Beijing	f	45	0	149	70	6.25	67.2	46.9	2.9	POS	POS	NA	YES	NO	Pos	NA	Pos	Neg	IPI 0-1	R-IPI 0	NCCN-IPI 0-1	NA	NA	NO	3.3863	Yes
21	1	Beijing	f	63	0	183	60	5.14	57.9	53.2	NA	POS	POS	POS	YES	YES	Pos	Neg	Neg	Pos	IPI 0-1	R-IPI 0	NCCN-IPI 0-1	NA	YES	YES	3.48767	Yes
22	1	Neimenggu	f	61	0	187	60	5.85	56.9	21.4	NA	POS	POS	NA	YES	NO	NA	Pos	Neg	Neg	IPI 0-1	R-IPI 0	NCCN-IPI 0-1	NO	NA	YES	3.77534	Yes
23	1	Shandong	f	83	0	187	60	6.05	67.8	NA	3.7	NA	POS	POS	NA	NA	Pos	Pos	Neg	Neg	IPI 2-5	R-IPI 1-2	NCCN-IPI 2-3	NA	NA	YES	4.40548	Yes
24	1	Beijing	f	46	0	184	90	8.91	79.5	22.5	1.9	POS	POS	POS	YES	YES	Pos	Pos	Neg	Neg	IPI 0-1	R-IPI 1-2	NCCN-IPI 2-3	YES	NA	YES	4.70959	Yes
25	1	Zhejiang	f	35	0	195	80	4.57	83.1	25.7	2.3	POS	POS	POS	YES	YES	Pos	Neg	Neg	Neg	IPI 0-1	R-IPI 0	NCCN-IPI 0-1	YES	YES	YES	5.55616	Yes
26	1	Beijing	f	70	0	165	70	4.73	84.5	31.1	NA	NA	NA	POS	NA	NA	NA	Pos	NA	NA	IPI 0-1	R-IPI 0	NA	YES	NO	YES	7.95616	Yes
27	1	Hebei	f	53	0	131	70	4.97	74.9	33.6	NA	Neg	POS	Neg	NO	NO	Pos	Pos	Pos	Neg	IPI 0-1	R-IPI 1-2	NCCN-IPI 2-3	YES	NO	YES	8.16986	Yes
28	1	Neimenggu	f	49	0	130	NA	3.63	67.3	NA	2.4	NA	Neg	NA	NA	NA	NA	Pos	NA	Neg	IPI 0-1	R-IPI 1-2	NCCN-IPI 2-3	YES	NO	YES	8.25479	Yes
29	1	Beijing	f	54	0	178	60	9.61	73.5	NA	NA	POS	POS	Neg	YES	NO	NA	Neg	NA	Neg	IPI 0-1	R-IPI 0	NCCN-IPI 4-5	NA	NO	YES	9.83014	Dead
30	2	Shanxi	f	50	0	146	60	3.63	56.8	26.9	NA	POS	POS	NA	YES	NO	Pos	Pos	Neg	Neg	IPI 2-5	R-IPI 1-2	NCCN-IPI 0-1	YES	NO	NO	10.4274	Yes
31	2	Hebei	f	56	0	135	70	9.17	86.7	29	NA	POS	POS	POS	YES	YES	Pos	Pos	Neg	Neg	IPI 0-1	R-IPI 1-2	NCCN-IPI 0-1	YES	YES	NO	10.726	Yes
32	2	Hebei	f	65	1	330	60	4.15	58.1	52.6	1.9	POS	POS	POS	YES	YES	Neg	Neg	Neg	Neg	IPI 2-5	R-IPI 3-5	NCCN-IPI 4-5	NO	NA	YES	11.3616	Yes
33	2	Hebei	f	74	1	178	60	5.25	67.4	53.6	1.5	POS	POS	POS	YES	YES	Pos	Neg	NA	Neg	IPI 2-5	R-IPI 3-5	NCCN-IPI 4-5	YES	NA	YES	11.6548	Yes
34	2	Beijing	f	70	1	132	50	7.92	95.1	46.8	1.6	POS	POS	POS	YES	YES	Neg	Neg	Pos	Pos	IPI 0-1	R-IPI 1-2	NCCN-IPI 2-3	YES	NA	NO	11.6575	Yes
35	2	Beijing	f	76	0	NA	60	6.37	65.7	24.6	3.3	POS	POS	POS	YES	YES	NA	Neg	Pos	Neg	IPI 2-5	R-IPI 1-2	NCCN-IPI 2-3	YES	NA	YES	12.5973	Yes
36	2	Beijing	f	53	0	145	70	6.69	66.8	26.7	1.8	POS	POS	POS	YES	YES	Neg	Neg	Neg	Pos	IPI 0-1	R-IPI 0	NCCN-IPI 0-1	NO	NA	YES	17.9671	Dead
37	2	Huhehaote	f	83	0	NA	60	7.55	75.1	26.9	NA	POS	POS	POS	YES	YES	Pos	Pos	NA	Neg	IPI 2-5	R-IPI 1-2	NCCN-IPI 4-5	NO	NA	YES	18.8521	Yes
38	2	Liaoning	f	72	1	NA	70	8.94	NA	30	3.7	POS	POS	POS	YES	YES	Pos	Pos	Neg	Neg	IPI 2-5	R-IPI 3-5	NCCN-IPI 2-3	YES	NA	NO	19.1315	Yes
39	2	Beijing	f	62	0	385	70	7.25	56.9	32.2	2.1	NA	Neg	NA	NA	NA	Neg	Pos	Pos	Neg	IPI 2-5	R-IPI 3-5	NCCN-IPI 2-3	NO	NA	NO	19.1397	Yes
40	2	Neimenggu	f	67	0	197	30	7.22	67.2	22.2	2.2	Neg	POS	NA	NO	NO	Neg	Pos	NA	Pos	IPI 2-5	R-IPI 3-5	NCCN-IPI 2-3	YES	NA	NO	19.3315	Yes
41	2	Beijing	f	51	0	167	70	3.88	56	NA	2.6	Neg	POS	POS	NO	NO	Pos	Pos	NA	Neg	IPI 0-1	R-IPI 1-2	NCCN-IPI 4-5	NA	NO	YES	19.389	Dead
42	2	Beijing	f	71	0	178	60	6.85	78.1	39.1	2.4	NA	POS	POS	NA	NA	Neg	Neg	Neg	Neg	IPI 2-5	R-IPI 1-2	NCCN-IPI 0-1	NO	NO	NO	19.5945	Yes
43	2	Hebei	f	74	0	220	60	4.54	44.5	37.1	NA	Neg	POS	POS	NO	NO	NA	Neg	NA	Neg	IPI 2-5	R-IPI 1-2	NCCN-IPI 4-5	YES	NO	YES	20.189	Yes
44	2	Beijing	f	86	0	NA	60	3.9	44.7	NA	1.9	Neg	POS	POS	NO	NO	Neg	Neg	NA	Neg	IPI 2-5	R-IPI 3-5	NA	NO	NO	NO	20.2959	Yes
45	2	Beijing	f	48	0	156	60	5.28	48.6	47.6	2.1	Neg	POS	POS	NO	NO	NA	Neg	NA	Neg	IPI 0-1	R-IPI 0	NA	YES	YES	NO	21.7836	Yes
46	2	Beijing	f	69	0	176	60	7.18	56.1	27.9	2.2	NA	POS	POS	NA	NA	Neg	Pos	Pos	Neg	IPI 0-1	R-IPI 1-2	NCCN-IPI 2-3	NA	NA	YES	0.7	Yes
47	2	Hebei	f	48	0	176	40	20.98	78.9	25.5	2.4	Neg	POS	POS	NO	NO	Neg	NA	Neg	Neg	IPI 0-1	R-IPI 1-2	NCCN-IPI 2-3	YES	NA	NO	1	Yes
48	2	Hebei	f	77	0	243	60	7.19	48.8	NA	1.9	NA	POS	Neg	NA	NA	NA	Neg	NA	Neg	IPI 2-5	R-IPI 1-2	NCCN-IPI 2-3	NO	NA	NO	1	Yes
49	2	Shandong	f	60	0	226	70	8.09	56.9	21.1	NA	Neg	Neg	POS	NO	NO	Neg	NA	Neg	Neg	IPI 2-5	R-IPI 1-2	NCCN-IPI 2-3	NO	YES	YES	1	Yes
50	2	Beijing	f	39	0	165	40	15.87	81.2	22.8	1.7	NA	Neg	Neg	NA	NA	NA	Neg	Neg	Neg	IPI 2-5	R-IPI 3-5	NCCN-IPI 4-5	NO	NO	NO	1.1	Yes
51	2	Shandong	f	52	0	234	50	6.01	58.1	NA	4.1	Neg	POS	POS	NO	NO	Neg	Neg	NA	Neg	IPI 0-1	R-IPI 0	NCCN-IPI 2-3	NA	NO	YES	2.19452	Yes
52	2	Hebei	f	60	0	NA	50	7.09	56.9	23.5	1.7	Neg	Neg	NA	NO	NO	NA	NA	NA	Neg	IPI 2-5	R-IPI 1-2	NA	YES	NO	YES	2.36986	Yes
53	2	Beijing	f	56	0	278.1	50	7.81	88.5	22.8	1.5	Neg	POS	POS	NO	NO	Neg	NA	Neg	Neg	IPI 0-1	R-IPI 1-2	NCCN-IPI 0-1	YES	NO	NO	2.98356	Yes
54	2	Hebei	f	83	0	154	50	NA	67.1	NA	3.6	NA	Neg	POS	NA	NA	NA	Neg	Neg	Neg	IPI 0-1	R-IPI 0	NCCN-IPI 4-5	YES	NO	YES	3.77534	Yes
55	2	Beijing	f	52	0	134	20	8.01	56.9	32.4	0.9	Neg	Neg	POS	NO	NO	Neg	NA	NA	Neg	IPI 0-1	R-IPI 0	NCCN-IPI 2-3	YES	NO	NO	4.29863	Yes
56	3	Beijing	f	47	0	292.3	50	7.79	87.1	46.8	1.1	Neg	Neg	NA	NO	NO	Neg	Neg	Pos	Pos	IPI 0-1	R-IPI 1-2	NCCN-IPI 0-1	NO	NO	YES	4.33151	Yes
57	3	Beijing	f	27	0	256	60	6.89	72.3	NA	3.3	NA	Neg	POS	NA	NA	NA	Neg	Neg	NA	IPI 0-1	R-IPI 1-2	NCCN-IPI 0-1	YES	YES	YES	4.61918	Dead
58	3	Anyang	f	23	0	NA	60	6.71	86.3	NA	1.4	NA	Neg	NA	NA	NA	NA	Neg	NA	Pos	IPI 0-1	R-IPI 0	NA	NO	YES	YES	4.73151	Dead
59	3	Henan	f	38	0	NA	20	6.78	85.2	33.7	4	Neg	Neg	NA	NO	NO	NA	Neg	NA	NA	IPI 2-5	R-IPI 1-2	NA	YES	NA	YES	4.96164	Yes
60	3	Henan	f	38	0	264	60	8.67	67.8	51.4	NA	Neg	Neg	POS	NO	NO	NA	NA	NA	NA	IPI 2-5	R-IPI 3-5	NCCN-IPI 4-5	YES	NA	YES	5.4	Yes
61	3	Henan	f	64	0	278	10	7.54	66.6	51.4	2.8	Neg	POS	NA	NO	NO	Neg	NA	Neg	NA	IPI 2-5	R-IPI 1-2	NCCN-IPI 2-3	YES	NO	NO	5.42192	Yes
62	3	Beijing	f	38	0	167	70	6.78	84.1	34.6	1.5	Neg	Neg	NA	NO	NO	Neg	NA	NA	NA	IPI 0-1	R-IPI 0	NCCN-IPI 0-1	YES	YES	YES	6.41918	Yes
63	3	Shandong	f	73	0	145	70	8.9	84.1	36.1	3	Neg	Neg	NA	NO	NO	Neg	NA	Pos	Neg	IPI 0-1	R-IPI 0	NA	YES	NA	YES	7.2274	Yes
64	3	Shandong	f	39	0	NA	10	NA	56.9	NA	1.8	Neg	Neg	NA	NO	NO	NA	NA	NA	Neg	IPI 0-1	R-IPI 0	NA	YES	NA	YES	7.73425	Yes
65	3	Henan	f	27	0	NA	10	6.91	76.2	46.8	1.4	Neg	Neg	NA	NO	NO	NA	NA	NA	Neg	IPI 0-1	R-IPI 0	NA	YES	NA	YES	8.57534	Yes
66	3	Shandong	f	54	0	296	60	13.78	57.9	46.8	2.8	Neg	Neg	NA	NO	NO	NA	NA	NA	Neg	IPI 0-1	R-IPI 0	NCCN-IPI 2-3	NA	NA	YES	8.6411	Yes
67	3	Hubei	f	70	0	167	60	8.9	81.2	27.4	2	Neg	Neg	NA	NO	NO	Neg	NA	NA	Neg	IPI 0-1	R-IPI 1-2	NCCN-IPI 2-3	YES	NA	YES	9.41096	Dead
68	3	Henan	f	56	0	134	60	7.9	71.2	37.2	2.1	Neg	Neg	NA	NO	NO	NA	NA	NA	Neg	IPI 0-1	R-IPI 0	NCCN-IPI 0-1	NA	NA	YES	10.011	Yes
69	3	Hebei	f	53	0	169	50	8.45	79.1	NA	2.2	NA	Neg	NA	NA	NA	NA	NA	NA	Neg	IPI 0-1	R-IPI 1-2	NCCN-IPI 2-3	YES	NA	YES	13.6493	Yes
70	3	Hubei	f	39	0	156	50	5.89	81.2	38.1	2.3	Neg	Neg	NA	NO	NO	Neg	NA	NA	Neg	IPI 0-1	R-IPI 0	NCCN-IPI 0-1	NA	NA	YES	13.937	Dead
71	3	Henan	f	48	0	178	NA	6.09	78	33.5	2.4	NA	Neg	NA	NA	NA	Neg	NA	NA	Neg	IPI 0-1	R-IPI 0	NCCN-IPI 0-1	NA	NA	YES	14.5699	Yes
